# Supplementary material for: Impedance Spectroscopic Study of Nickel Sulfide Nanostructures Deposited by Aerosol Assisted Chemical Vapor Deposition Technique
Source: MDPI journal article supplement (doi:10.3390/nano11051105), 2021-04-24
Supplement: s1 [file s1]

## Supplementary Information

|                                                                                                                                                              |          |       |
|--------------------------------------------------------------------------------------------------------------------------------------------------------------|----------|-------|
| <b>Mr M JENNINGS</b><br><b>MICRO ANALYTICAL LABORATORY</b><br><b>SCHOOL OF CHEMISTRY</b><br><b>THE UNIVERSITY OF MANCHESTER</b><br><b>MANCHESTER M13 9PL</b> |          |       |
| PLEASE GIVE APPROX. PERCENTAGES OF ELEMENTS<br>PRESENT IN THE EXPECTED COLUMN.                                                                               |          |       |
|                                                                                                                                                              | EXPECTED | FOUND |
| C                                                                                                                                                            | 40.26    | 40.22 |
| H                                                                                                                                                            | 7.6      | 7.60  |
| N                                                                                                                                                            |          |       |
| Cl                                                                                                                                                           |          |       |
| Br                                                                                                                                                           |          |       |
| I                                                                                                                                                            |          |       |
| F                                                                                                                                                            |          |       |
| S                                                                                                                                                            | 26.86    | 26.97 |
| P                                                                                                                                                            | 12.98    | 12.82 |
| Mol.Wt.                                                                                                                                                      | 477.36   |       |
| Ni                                                                                                                                                           | 12.3     | 12.06 |
| COMMENTS                                                                                                                                                     |          |       |
| TGA 12.36 mg                                                                                                                                                 |          |       |

**Figure S1.** Elemental analysis of  $[\text{Ni}(\text{iBu}_2\text{PS}_2)_2]$ .

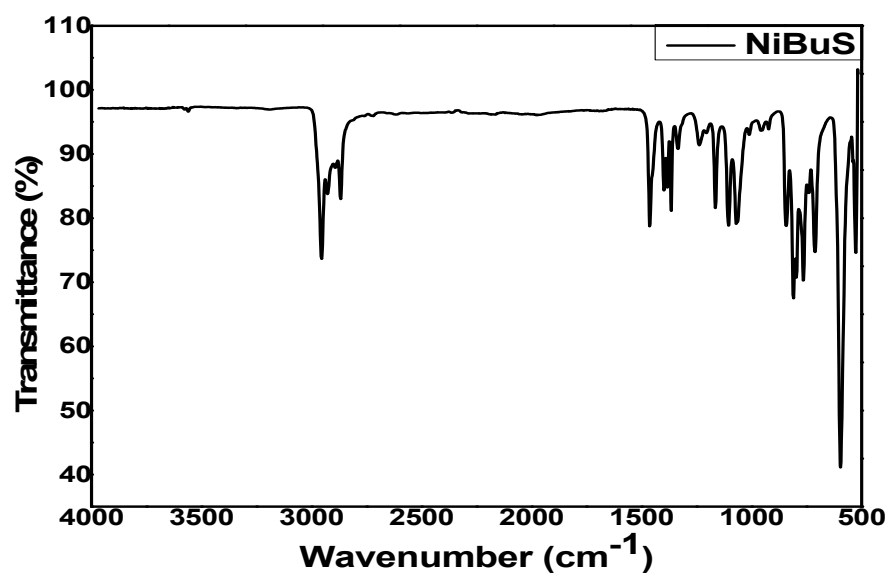

Figure S2. FTIR of  $[\text{Ni}(\text{iBu}_2\text{PS}_2)_2]$ .

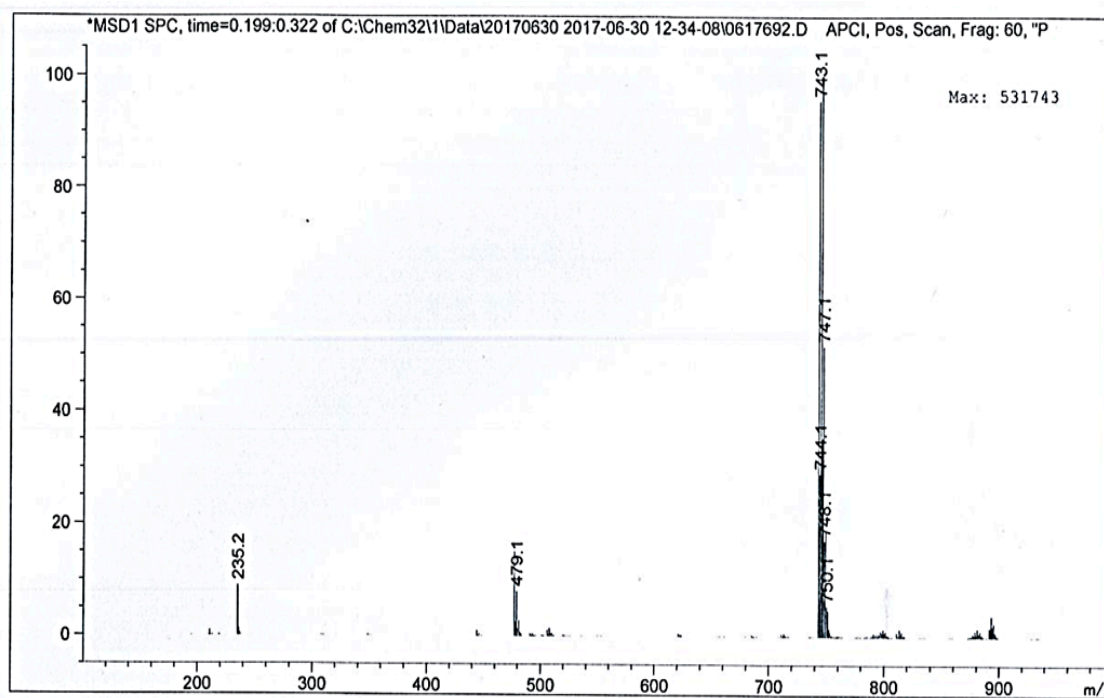

Figure S3. Mass Spectra of  $[\text{Ni}(\text{iBu}_2\text{PS}_2)_2]$ .

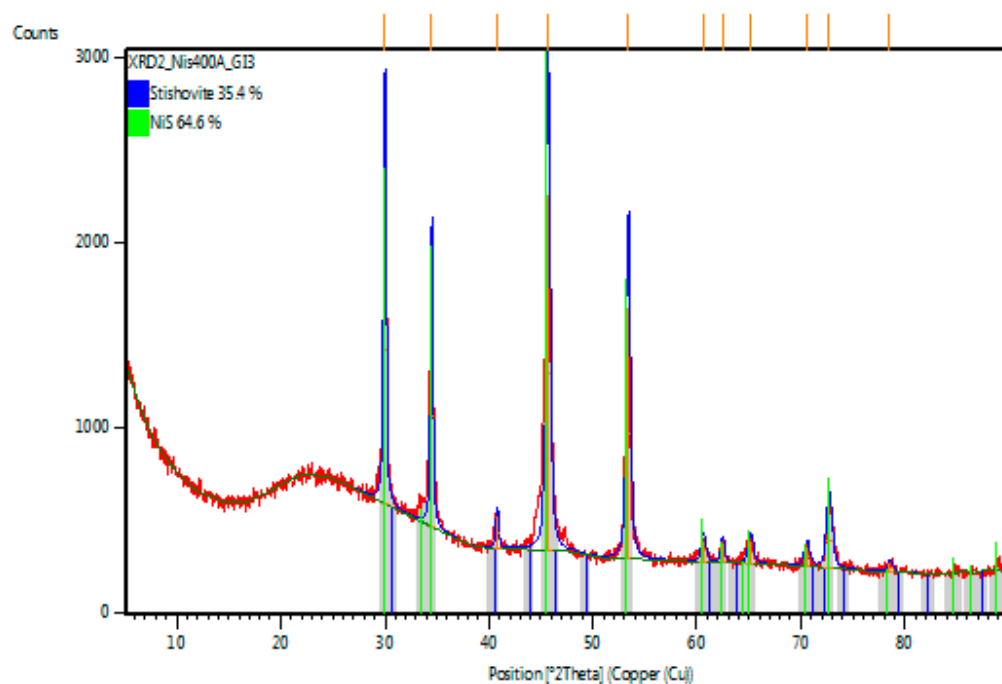

### Peak List

| Pos. [°2Th.]               | Height [cts]     | FWHMLeft [°2Th.] | d-spacing [Å] | Rel. Int. [%] |
|----------------------------|------------------|------------------|---------------|---------------|
| <u>TipWidth Matched by</u> |                  |                  |               |               |
| 29.9883                    | 1657.23          | 0.2952           | 2.97981       | 86.17         |
| 0.3542                     | 96-900-9241      |                  |               |               |
| 34.4906                    | 1206.79          | 0.2952           | 2.60044       | 62.75         |
| 0.3542                     | 96-900-9241      |                  |               |               |
| 40.7825                    | 172.01           | 0.2952           | 2.21261       | 8.94          |
| 0.3542                     | 96-900-7153      |                  |               |               |
| 45.6720                    | 1923.14          | 0.4428           | 1.98647       | 100.00        |
| 0.5314                     | 96-900-9241      |                  |               |               |
| 53.3815                    | 1358.14          | 0.4428           | 1.71634       | 70.62         |
| 0.5314                     | 96-900-9241      |                  |               |               |
| 60.6115                    | 114.10           | 0.4920           | 1.52777       | 5.93          |
| 0.5904                     | 96-900-7153;96.. |                  |               |               |
| 62.4412                    | 105.87           | 0.3936           | 1.48734       | 5.51          |
| 0.4723                     | 96-900-9241      |                  |               |               |
| 65.1305                    | 117.59           | 0.5904           | 1.43228       | 6.11          |
| 0.7085                     | 96-900-9241      |                  |               |               |
| 70.5385                    | 101.38           | 0.5904           | 1.33514       | 5.27          |
| 0.7085                     | 96-900-7153;96.. |                  |               |               |
| 72.6745                    | 302.45           | 0.5904           | 1.30108       | 15.73         |
| 0.7085                     | 96-900-7153;96.. |                  |               |               |
| 78.5452                    | 50.47            | 0.5904           | 1.21789       | 2.62          |

0.7085 96-900-7153;96..

### **Pattern List**

| Visible       | Ref.Code     | Score | Compound Name | Displ.[°2Th] | Scale Fac. |
|---------------|--------------|-------|---------------|--------------|------------|
| <hr/>         |              |       |               |              |            |
| Chem. Formula | <hr/>        |       |               |              |            |
| *             | 96-900-7153  | 16    | Stishovite    | 0.000        |            |
| 0.106         | Si2.00 O4.00 |       |               |              |            |
| *             | 96-900-9241  | 78    | NiS           | 0.000        |            |
| 1.042         | Ni2.00 S2.00 |       |               |              |            |

### **Graphics**

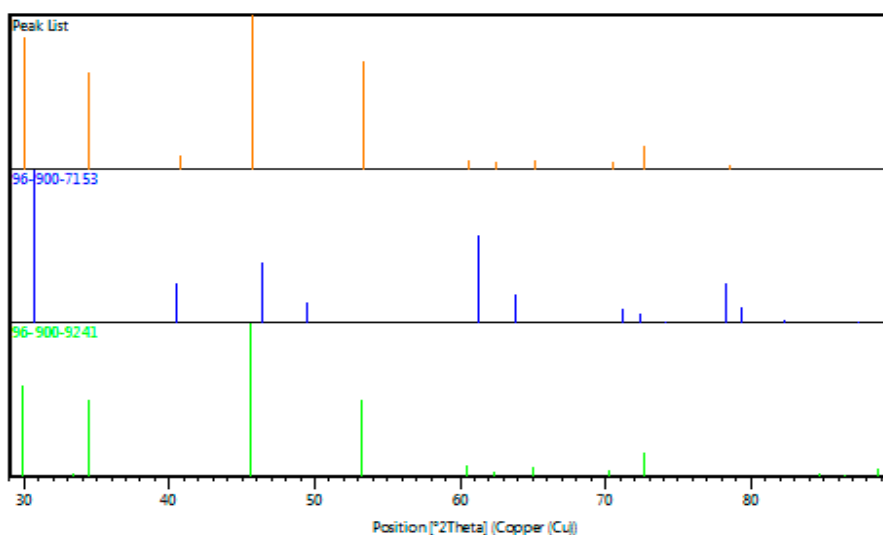

**Figure S4.** Rietveld Refinement graphics of NiS.400A

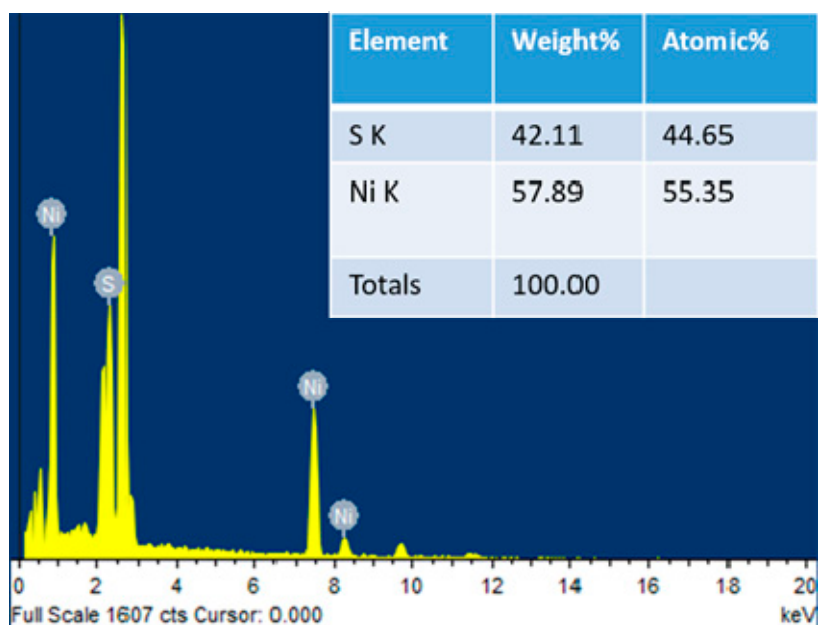

Figure S5a. EDX analysis of NiS at 400 °C

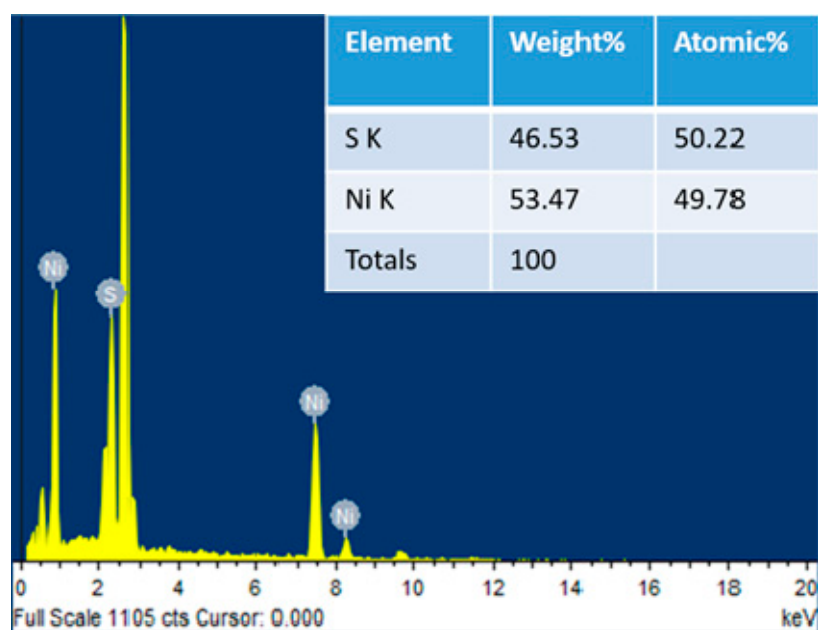

Figure S5b. EDX analysis of NiS at 450 °C
